# Supplementary material for: Intersexuality/Differences of Sex Development through the Discourse of Intersex People, Their Relatives, and Health Experts: A Descriptive Qualitative Study
Source: MDPI journal article supplement (doi:10.3390/healthcare10040671), 2022-04-02
Supplement: s1 [file s1]

**Table S1.** Spheres, categories, subcategories and number of verbatims extracted from interviews

| Spheres                     | Categories                                                           | Subcategories                                                                            | Verbatim (N) |
|-----------------------------|----------------------------------------------------------------------|------------------------------------------------------------------------------------------|--------------|
| Intersex/DSD as a Community | Intersex/DSD Term                                                    | - Knowledge about the term Intersex/DSD                                                  | N=3          |
|                             |                                                                      | - Identity with respect to the term Intersex/DSD                                         | N=8          |
|                             |                                                                      | - Intersex/DSD as a Whole                                                                | N=9          |
|                             |                                                                      | - Intersex/DSD as part of the LGBTIQ+ community                                          | N=13         |
|                             | Organizations                                                        | - Organizations Benefits                                                                 | N=12         |
|                             |                                                                      | - Contact between Organizations of Different Types of Intersex/DSD                       | N=9          |
| Health Sphere Approach      | Communication of the Diagnosis                                       | - Diagnosis detection                                                                    | N=8          |
|                             |                                                                      | - Healthcare                                                                             | N=10         |
|                             |                                                                      | - Risk behaviors                                                                         | N=2          |
|                             | Health Process                                                       | - Surgical interventions                                                                 | N=22         |
|                             |                                                                      | - Treatments y Examinations                                                              | N=10         |
|                             |                                                                      | - Limitations of Healthcare benefits                                                     | N=25         |
| Law Sphere Approach         | Strengths/ Weaknesses of the Policies Against LGBTIQ+ Discrimination | - Legislations Concerning 'gender normalizing' surgeries for the Intersex/DSD population | N=8          |
|                             |                                                                      | - Policies on the Undefined Sex                                                          | N=4          |
| Psychosocial Approach       | Social Relations                                                     | - Friends                                                                                | N=6          |
|                             |                                                                      | - Relatives                                                                              | N=3          |
|                             |                                                                      | - Partners                                                                               | N=9          |
|                             | Daily Dynamics                                                       | - Work                                                                                   | N=5          |
|                             |                                                                      | - Family                                                                                 | N=5          |
|                             | Psychological Impact                                                 | - Feelings after Diagnosis Communication                                                 | N=5          |
|                             |                                                                      | - Self-perception                                                                        | N=9          |
|                             | Social Influence                                                     | - Social Unawareness                                                                     | N=18         |
|                             |                                                                      | - Influence of Gender Stereotypes                                                        | N=13         |
